# Supplementary material for: Construction of 1D Heterostructure NiCo@C/ZnO Nanorod with Enhanced Microwave Absorption
Source: PubMed Central journal article supplement (PMC8368508; doi:10.1007/s40820-021-00704-5), 2021-08-16
Supplement: 40820_2021_704_MOESM1_ESM.pdf [file 40820_2021_704_MOESM1_ESM.pdf]

Supporting Information for

## Construction of 1D Heterostructure NiCo@C/ZnO Nanorod with Enhanced Microwave Absorption

Jianwei Wang<sup>1, #</sup>, Zirui Jia<sup>1, 2, 3, #</sup>, Xuehua Liu<sup>1</sup>, Jinlei Dou<sup>1</sup>, Binghui Xu<sup>1</sup>, Bingbing Wang<sup>1</sup>, Guanglei Wu<sup>1, \*</sup>

<sup>1</sup>Institute of Materials for Energy and Environment, State Key Laboratory of Bio-fibers and Eco-textiles, College of Materials Science and Engineering, Qingdao University, Qingdao 266071, P. R. China

<sup>2</sup>College of Chemistry and Chemical Engineering, Qingdao University, Shandong, Qingdao 266071, P. R. China

<sup>3</sup>Weihai Innovation Institute, Qingdao University, Shandong, China 264200, P. R. China

#Jianwei Wang and Zirui Jia contributed equally to this work.

\*Corresponding author. E-mail: [wuguanglei@qdu.edu.cn](mailto:wuguanglei@qdu.edu.cn) or [wuguanglei@mail.xjtu.edu.cn](mailto:wuguanglei@mail.xjtu.edu.cn) (G. Wu)

### Supplementary Tables and Figures

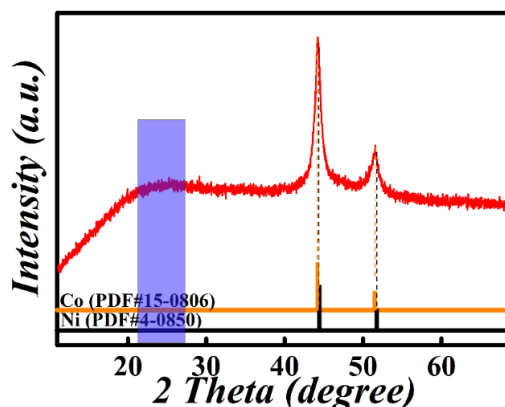

Fig. S1 XRD patterns of S-3

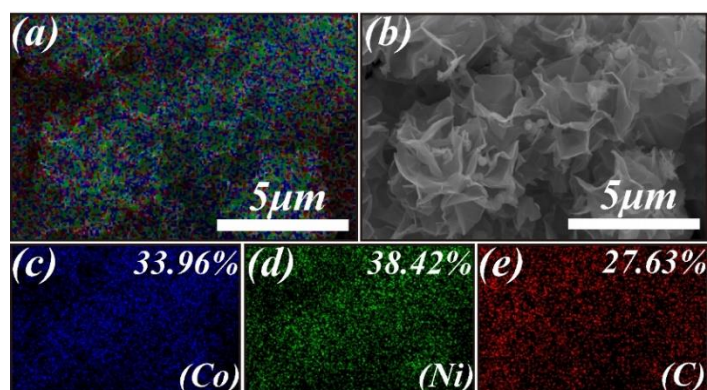

Fig. S2 elemental mapping distribution of S-3

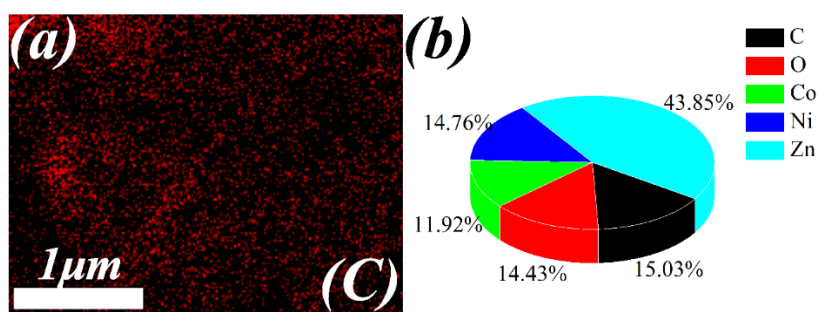

Fig. S3 (a) Carbon element distribution map. (b) Percentage of element in S-5

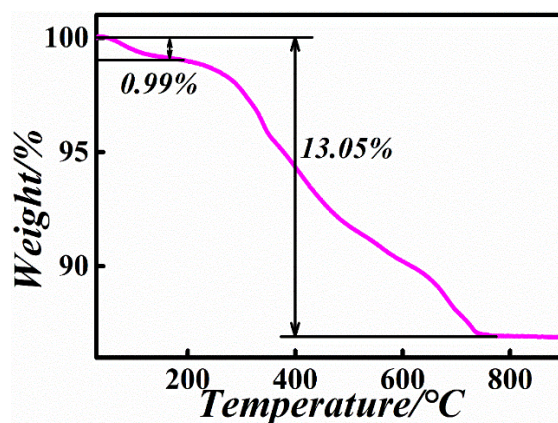

Fig. S4 TGA of S-4

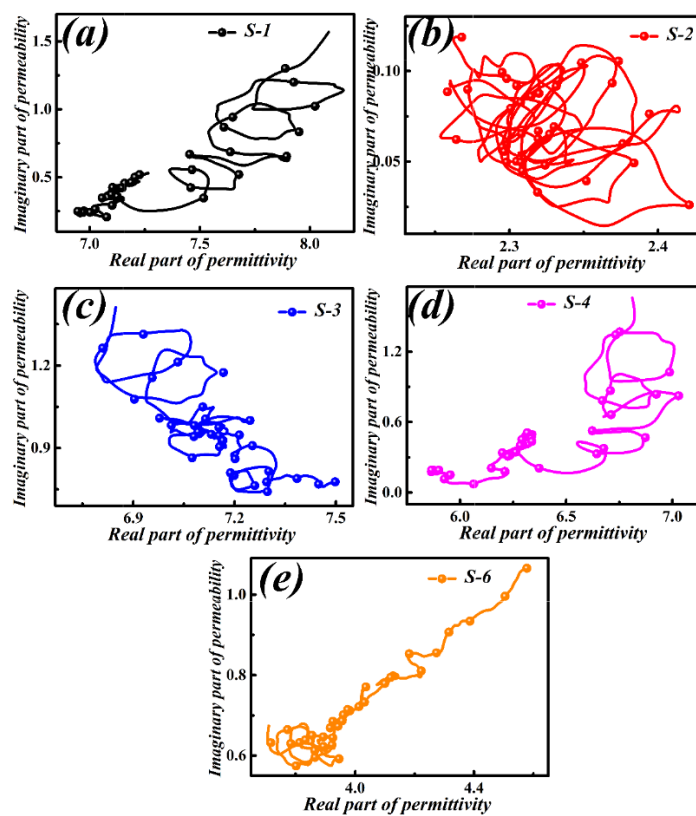

Fig. S5 Cole-Cole curves of (a) S-1, (b) S-2, (c) S-3, (d) S-4, (e) S-6
